# Supplementary material for: Smartphone Distraction: Italian Validation of the Smartphone Distraction Scale (SDS)
Source: MDPI journal article supplement (doi:10.3390/ijerph20156509), 2023-08-02
Supplement: s1 [file s1]

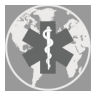

## Supplementary Materials

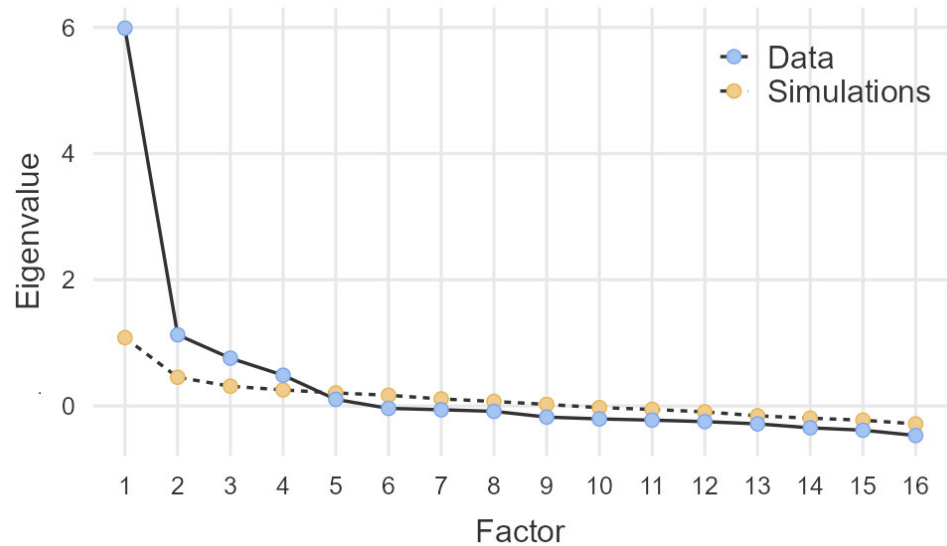

Figure S1. Scree plot and parallel analysis.

Table S1. Parameter estimates CFA – Model 1 – One factor.

| Indicator | Estimate | SE    | z value | p-value | 95% CI lower | 95% CI higher | R <sup>2</sup> |
|-----------|----------|-------|---------|---------|--------------|---------------|----------------|
| Item 1    | 0.930    | 0.049 | 19.009  | < .001  | 0.834        | 1.026         | 0.653          |
| Item 2    | 0.973    | 0.053 | 18.455  | < .001  | 0.869        | 1.076         | 0.628          |
| Item 3    | 0.916    | 0.054 | 16.904  | < .001  | 0.810        | 1.023         | 0.570          |
| Item 4    | 0.946    | 0.052 | 18.211  | < .001  | 0.845        | 1.048         | 0.617          |
| Item 5    | 0.541    | 0.059 | 9.201   | < .001  | 0.426        | 0.657         | 0.305          |
| Item 6    | 0.686    | 0.058 | 11.911  | < .001  | 0.573        | 0.799         | 0.448          |
| Item 7    | 0.323    | 0.051 | 6.327   | < .001  | 0.223        | 0.424         | 0.215          |
| Item 8    | 0.184    | 0.045 | 4.135   | < .001  | 0.097        | 0.272         | 0.096          |
| Item 9    | 0.485    | 0.072 | 6.761   | < .001  | 0.344        | 0.626         | 0.191          |
| Item 10   | 0.274    | 0.075 | 3.655   | < .001  | 0.127        | 0.421         | 0.055          |
| Item 11   | 0.543    | 0.071 | 7.679   | < .001  | 0.404        | 0.681         | 0.206          |
| Item 12   | 0.385    | 0.063 | 6.088   | < .001  | 0.261        | 0.509         | 0.157          |
| Item 13   | 0.608    | 0.071 | 8.622   | < .001  | 0.470        | 0.746         | 0.274          |
| Item 14   | 0.647    | 0.068 | 9.540   | < .001  | 0.514        | 0.779         | 0.287          |
| Item 15   | 0.798    | 0.060 | 13.239  | < .001  | 0.680        | 0.916         | 0.445          |
| Item 16   | 0.755    | 0.065 | 11.542  | < .001  | 0.626        | 0.883         | 0.360          |

Table S2. CFA – Model 2 - Parameter estimates.

| factor   | Indicator | Symbol          | Estimate | SE    | z value | p-value | 95% CI lower | 95% CI higher | R <sup>2</sup> |
|----------|-----------|-----------------|----------|-------|---------|---------|--------------|---------------|----------------|
| Factor 1 | Item 1    | λ <sub>11</sub> | 0.955    | 0.048 | 19.820  | < .001  | 0.861        | 1.050         | 0.689          |
|          | Item 2    | λ <sub>12</sub> | 1.020    | 0.052 | 19.455  | < .001  | 0.917        | 1.123         | 0.690          |
|          | Item 3    | λ <sub>13</sub> | 0.981    | 0.054 | 18.260  | < .001  | 0.875        | 1.086         | 0.653          |
|          | Item 4    | λ <sub>14</sub> | 0.983    | 0.054 | 18.225  | < .001  | 0.878        | 1.089         | 0.666          |
| Factor 2 | Item 5    | λ <sub>21</sub> | 0.653    | 0.064 | 10.201  | < .001  | 0.528        | 0.779         | 0.445          |

|          |         |                |       |       |        |        |       |       |       |
|----------|---------|----------------|-------|-------|--------|--------|-------|-------|-------|
|          | Item 6  | $\lambda_{22}$ | 0.884 | 0.056 | 15.783 | < .001 | 0.774 | 0.993 | 0.744 |
|          | Item 7  | $\lambda_{23}$ | 0.392 | 0.054 | 7.320  | < .001 | 0.287 | 0.497 | 0.316 |
|          | Item 8  | $\lambda_{24}$ | 0.258 | 0.045 | 5.776  | < .001 | 0.170 | 0.345 | 0.188 |
| Factor 3 | Item 9  | $\lambda_{31}$ | 0.514 | 0.083 | 6.221  | < .001 | 0.352 | 0.675 | 0.214 |
|          | Item 10 | $\lambda_{32}$ | 0.562 | 0.083 | 6.761  | < .001 | 0.399 | 0.725 | 0.229 |
|          | Item 11 | $\lambda_{33}$ | 0.836 | 0.071 | 11.816 | < .001 | 0.698 | 0.975 | 0.489 |
|          | Item 12 | $\lambda_{34}$ | 0.663 | 0.063 | 10.562 | < .001 | 0.540 | 0.786 | 0.463 |
| Factor 4 | Item 13 | $\lambda_{41}$ | 0.823 | 0.068 | 12.137 | < .001 | 0.690 | 0.955 | 0.502 |
|          | Item 14 | $\lambda_{42}$ | 0.910 | 0.063 | 14.415 | < .001 | 0.786 | 1.034 | 0.570 |
|          | Item 15 | $\lambda_{43}$ | 0.974 | 0.056 | 17.491 | < .001 | 0.865 | 1.084 | 0.663 |
|          | Item 16 | $\lambda_{44}$ | 0.958 | 0.060 | 16.079 | < .001 | 0.841 | 1.074 | 0.580 |

**Table S3.** CFA -Model 3 – Parameter estimates.

| factor       | Indicator | Symbol         | Estimate | SE    | z value | p-value | 95% CI lower | 95% CI higher | R <sup>2</sup> |
|--------------|-----------|----------------|----------|-------|---------|---------|--------------|---------------|----------------|
| First order  |           |                |          |       |         |         |              |               |                |
| Factor 1     | Item 1    | $\lambda_{11}$ | 0.434    | 0.070 | 6.175   | < .001  | 0.296        | 0.572         | 0.689          |
|              | Item 2    | $\lambda_{12}$ | 0.464    | 0.076 | 6.094   | < .001  | 0.314        | 0.613         | 0.691          |
|              | Item 3    | $\lambda_{13}$ | 0.446    | 0.073 | 6.094   | < .001  | 0.302        | 0.589         | 0.654          |
|              | Item 4    | $\lambda_{14}$ | 0.446    | 0.075 | 5.956   | < .001  | 0.299        | 0.592         | 0.664          |
| Factor 2     | Item 5    | $\lambda_{21}$ | 0.395    | 0.059 | 6.729   | < .001  | 0.280        | 0.510         | 0.447          |
|              | Item 6    | $\lambda_{22}$ | 0.531    | 0.065 | 8.230   | < .001  | 0.405        | 0.658         | 0.738          |
|              | Item 7    | $\lambda_{23}$ | 0.237    | 0.042 | 5.684   | < .001  | 0.156        | 0.319         | 0.318          |
|              | Item 8    | $\lambda_{24}$ | 0.156    | 0.030 | 5.242   | < .001  | 0.098        | 0.215         | 0.190          |
| Factor 3     | Item 9    | $\lambda_{31}$ | 0.396    | 0.068 | 5.848   | < .001  | 0.263        | 0.528         | 0.216          |
|              | Item 10   | $\lambda_{32}$ | 0.427    | 0.076 | 5.613   | < .001  | 0.278        | 0.575         | 0.225          |
|              | Item 11   | $\lambda_{33}$ | 0.648    | 0.072 | 9.051   | < .001  | 0.507        | 0.788         | 0.500          |
|              | Item 12   | $\lambda_{34}$ | 0.503    | 0.059 | 8.556   | < .001  | 0.387        | 0.618         | 0.454          |
| Factor 4     | Item 13   | $\lambda_{41}$ | 0.583    | 0.056 | 10.407  | < .001  | 0.473        | 0.692         | 0.504          |
|              | Item 14   | $\lambda_{42}$ | 0.643    | 0.059 | 10.953  | < .001  | 0.528        | 0.758         | 0.569          |
|              | Item 15   | $\lambda_{43}$ | 0.688    | 0.054 | 12.672  | < .001  | 0.581        | 0.794         | 0.661          |
|              | Item 16   | $\lambda_{44}$ | 0.677    | 0.057 | 11.880  | < .001  | 0.565        | 0.789         | 0.580          |
| Second order |           |                |          |       |         |         |              |               |                |
|              | Factor 1  | $\gamma_{11}$  | 1.962    | 0.400 | 4.910   | < .001  | 1.179        | 2.745         | 0.794          |
|              | Factor 2  | $\gamma_{12}$  | 1.321    | 0.219 | 6.040   | < .001  | 0.892        | 1.749         | 0.636          |
|              | Factor 3  | $\gamma_{13}$  | 0.839    | 0.151 | 5.564   | < .001  | 0.543        | 1.134         | 0.413          |
|              | Factor 4  | $\gamma_{14}$  | 1.001    | 0.131 | 7.645   | < .001  | 0.745        | 1.258         | 0.501          |
